# Supplementary material for: Genome-wide annotation and characterization of CLAVATA/ESR (CLE) peptide hormones of soybean (Glycine max) and common bean (Phaseolus vulgaris), and their orthologues of Arabidopsis thaliana
Source: PubMed Central journal article supplement (PMC4526924; doi:10.1093/jxb/erv351), 2015-07-17
Supplement: supp_erv351_Hastwell_et_al_Supp__Figures_and_Tables.pdf [file supp_erv351_Hastwell_et_al_Supp__Figures_and_Tables.pdf]

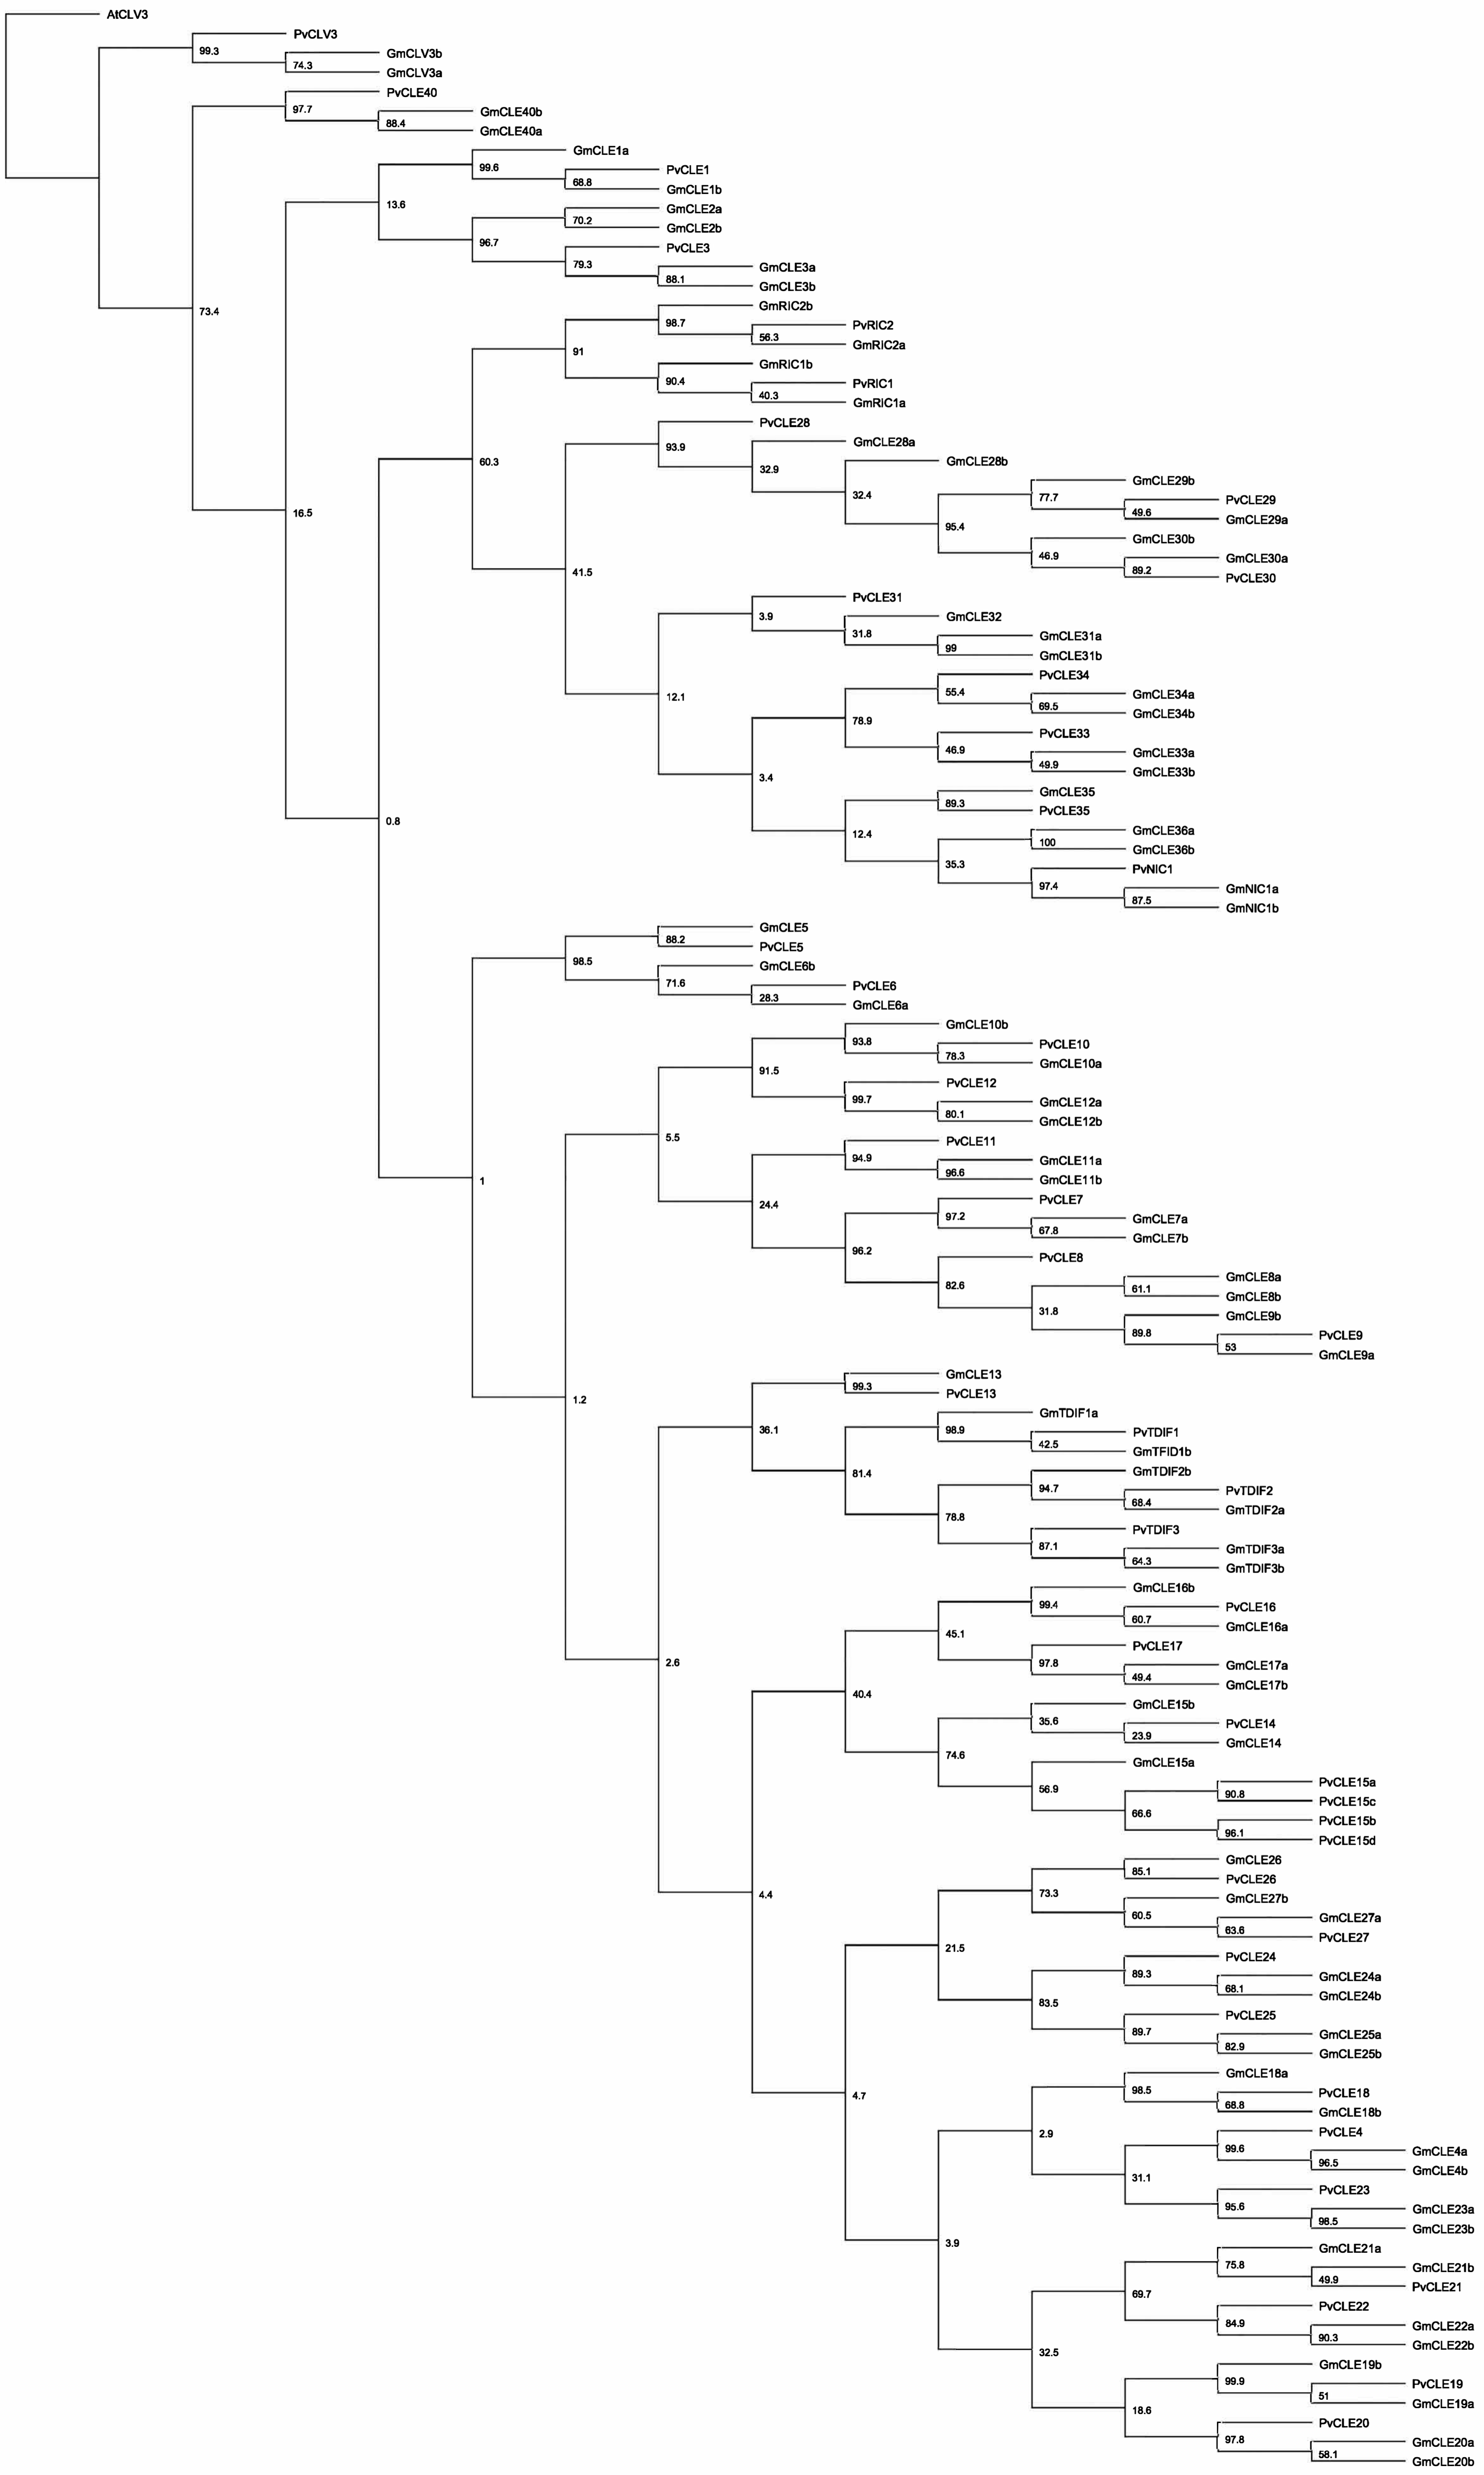

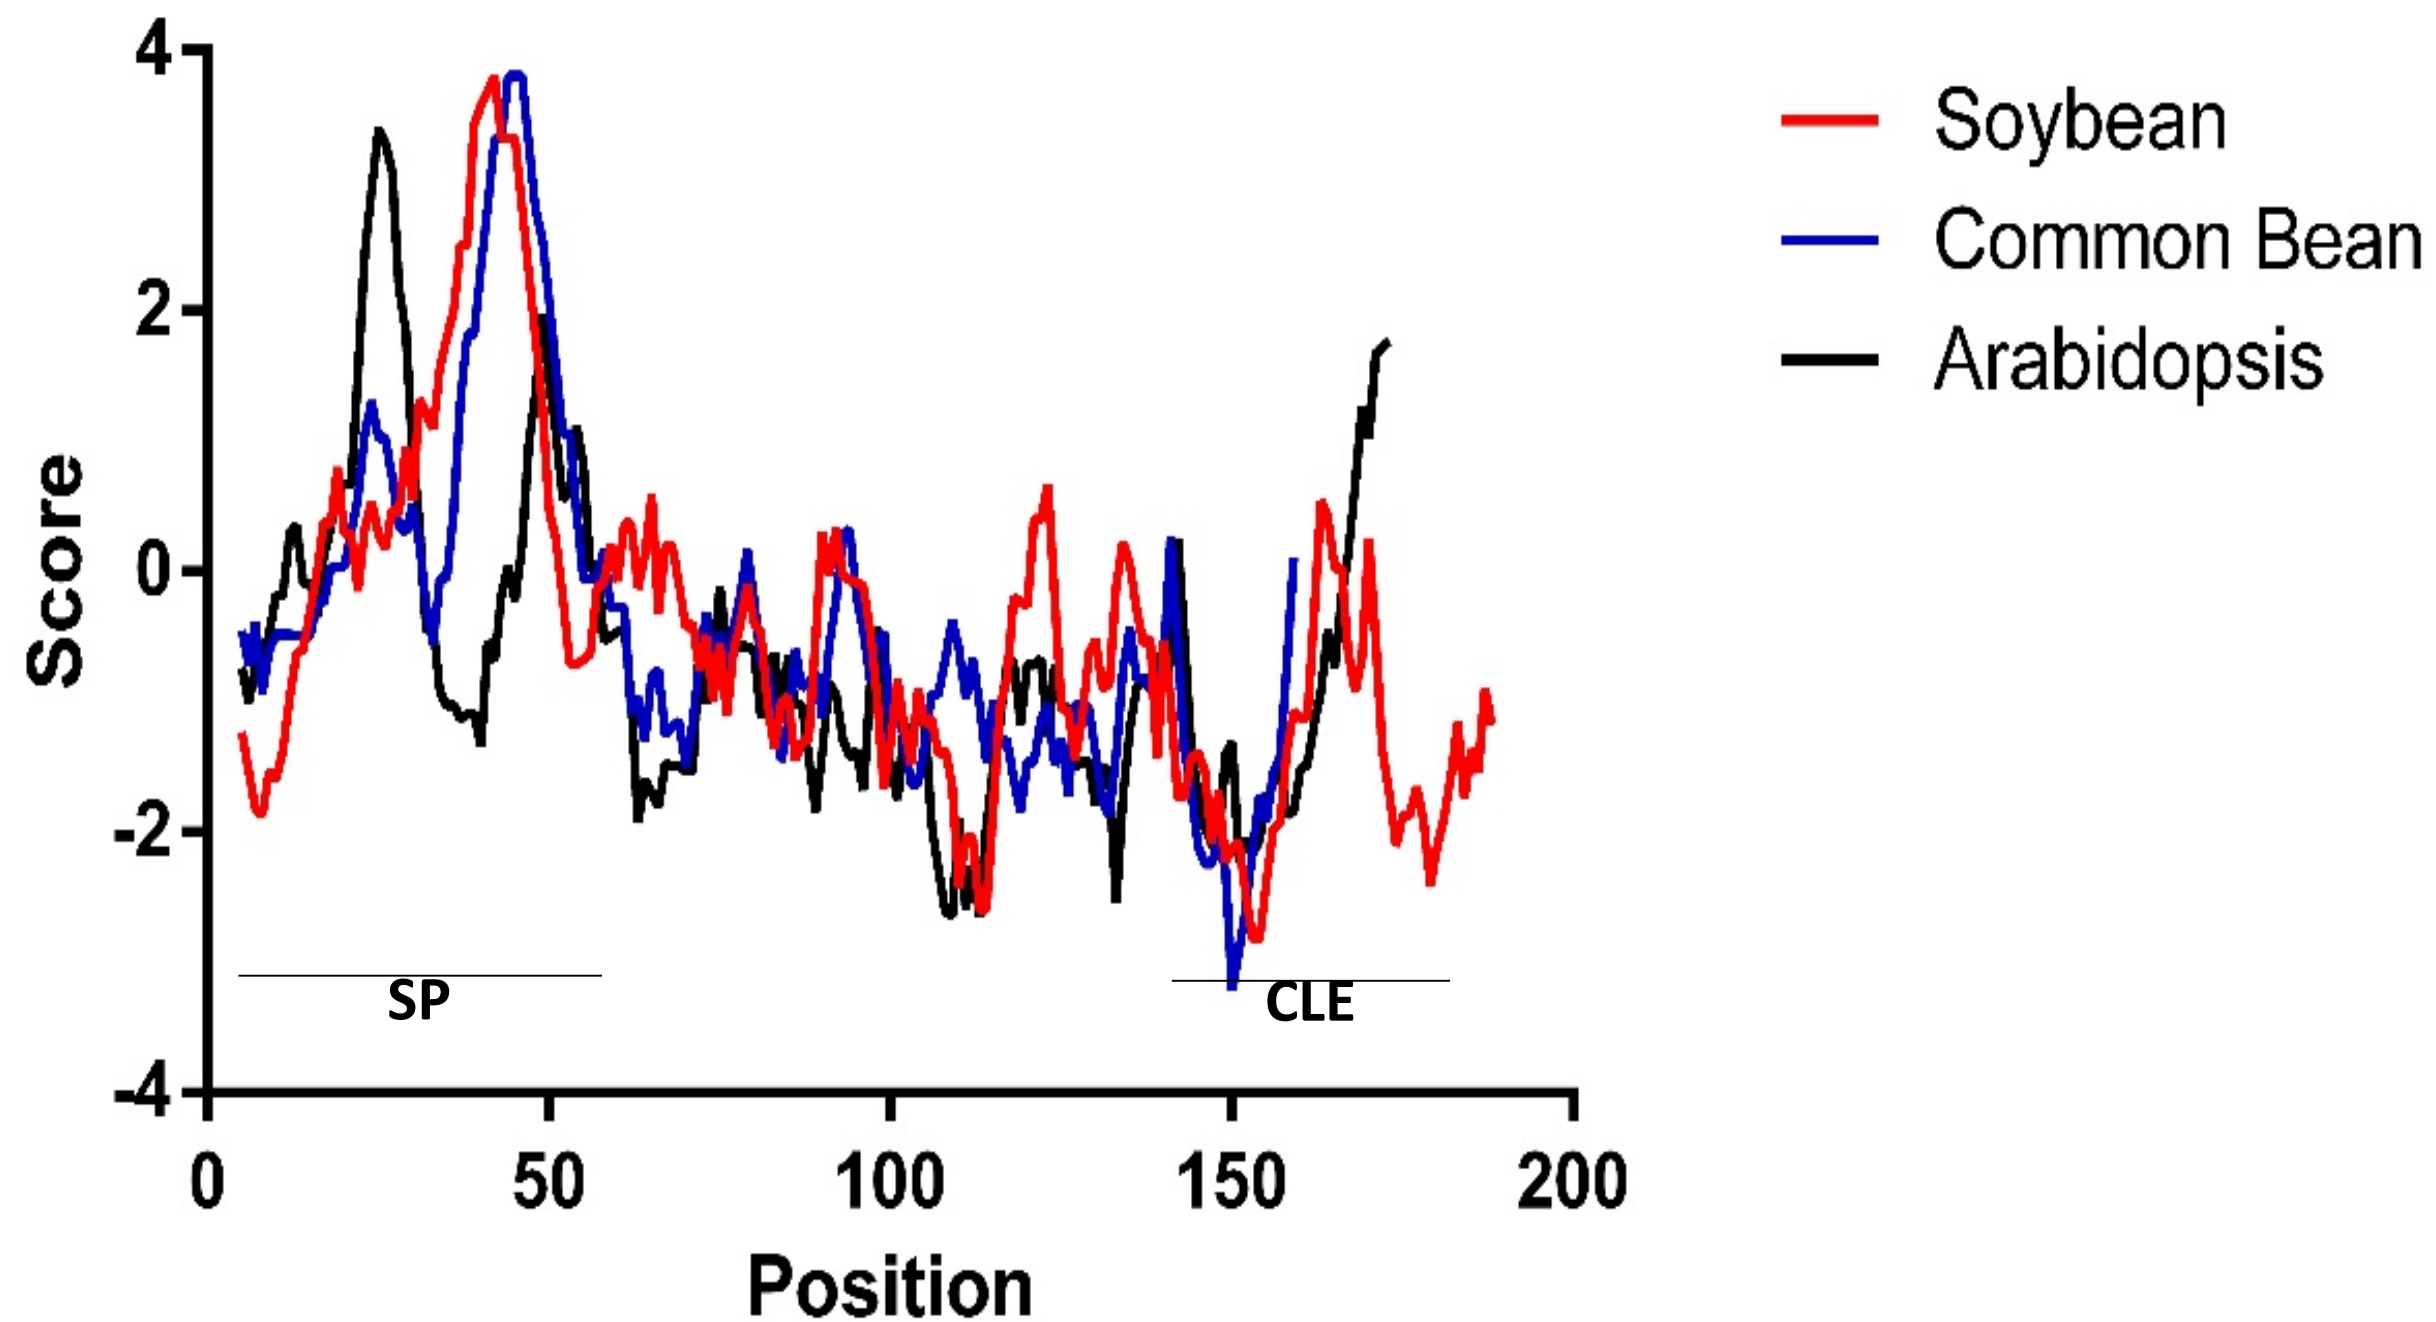

**Supplementary Figure 2.** Hydrophobicity plot of the CLE prepropeptides of soybean, common bean and Arabidopsis. Hydrophobicity scores were calculated according to Kyte and Doolittle (1982) for each amino acid in all Soybean (*G. max*), Common Bean (*P. vulgaris*), and Arabidopsis (*A. thaliana*) CLE prepropeptides based on the multiple sequence alignments shown in Figures 1 and 2. Amino acid hydrophobicity scores range from 4, being hydrophobic, to -4, being hydrophilic. Sequence positions highlighted include the hydrophobic Signal Peptide (SP) and CLE Domain (CLE).

# CLV3

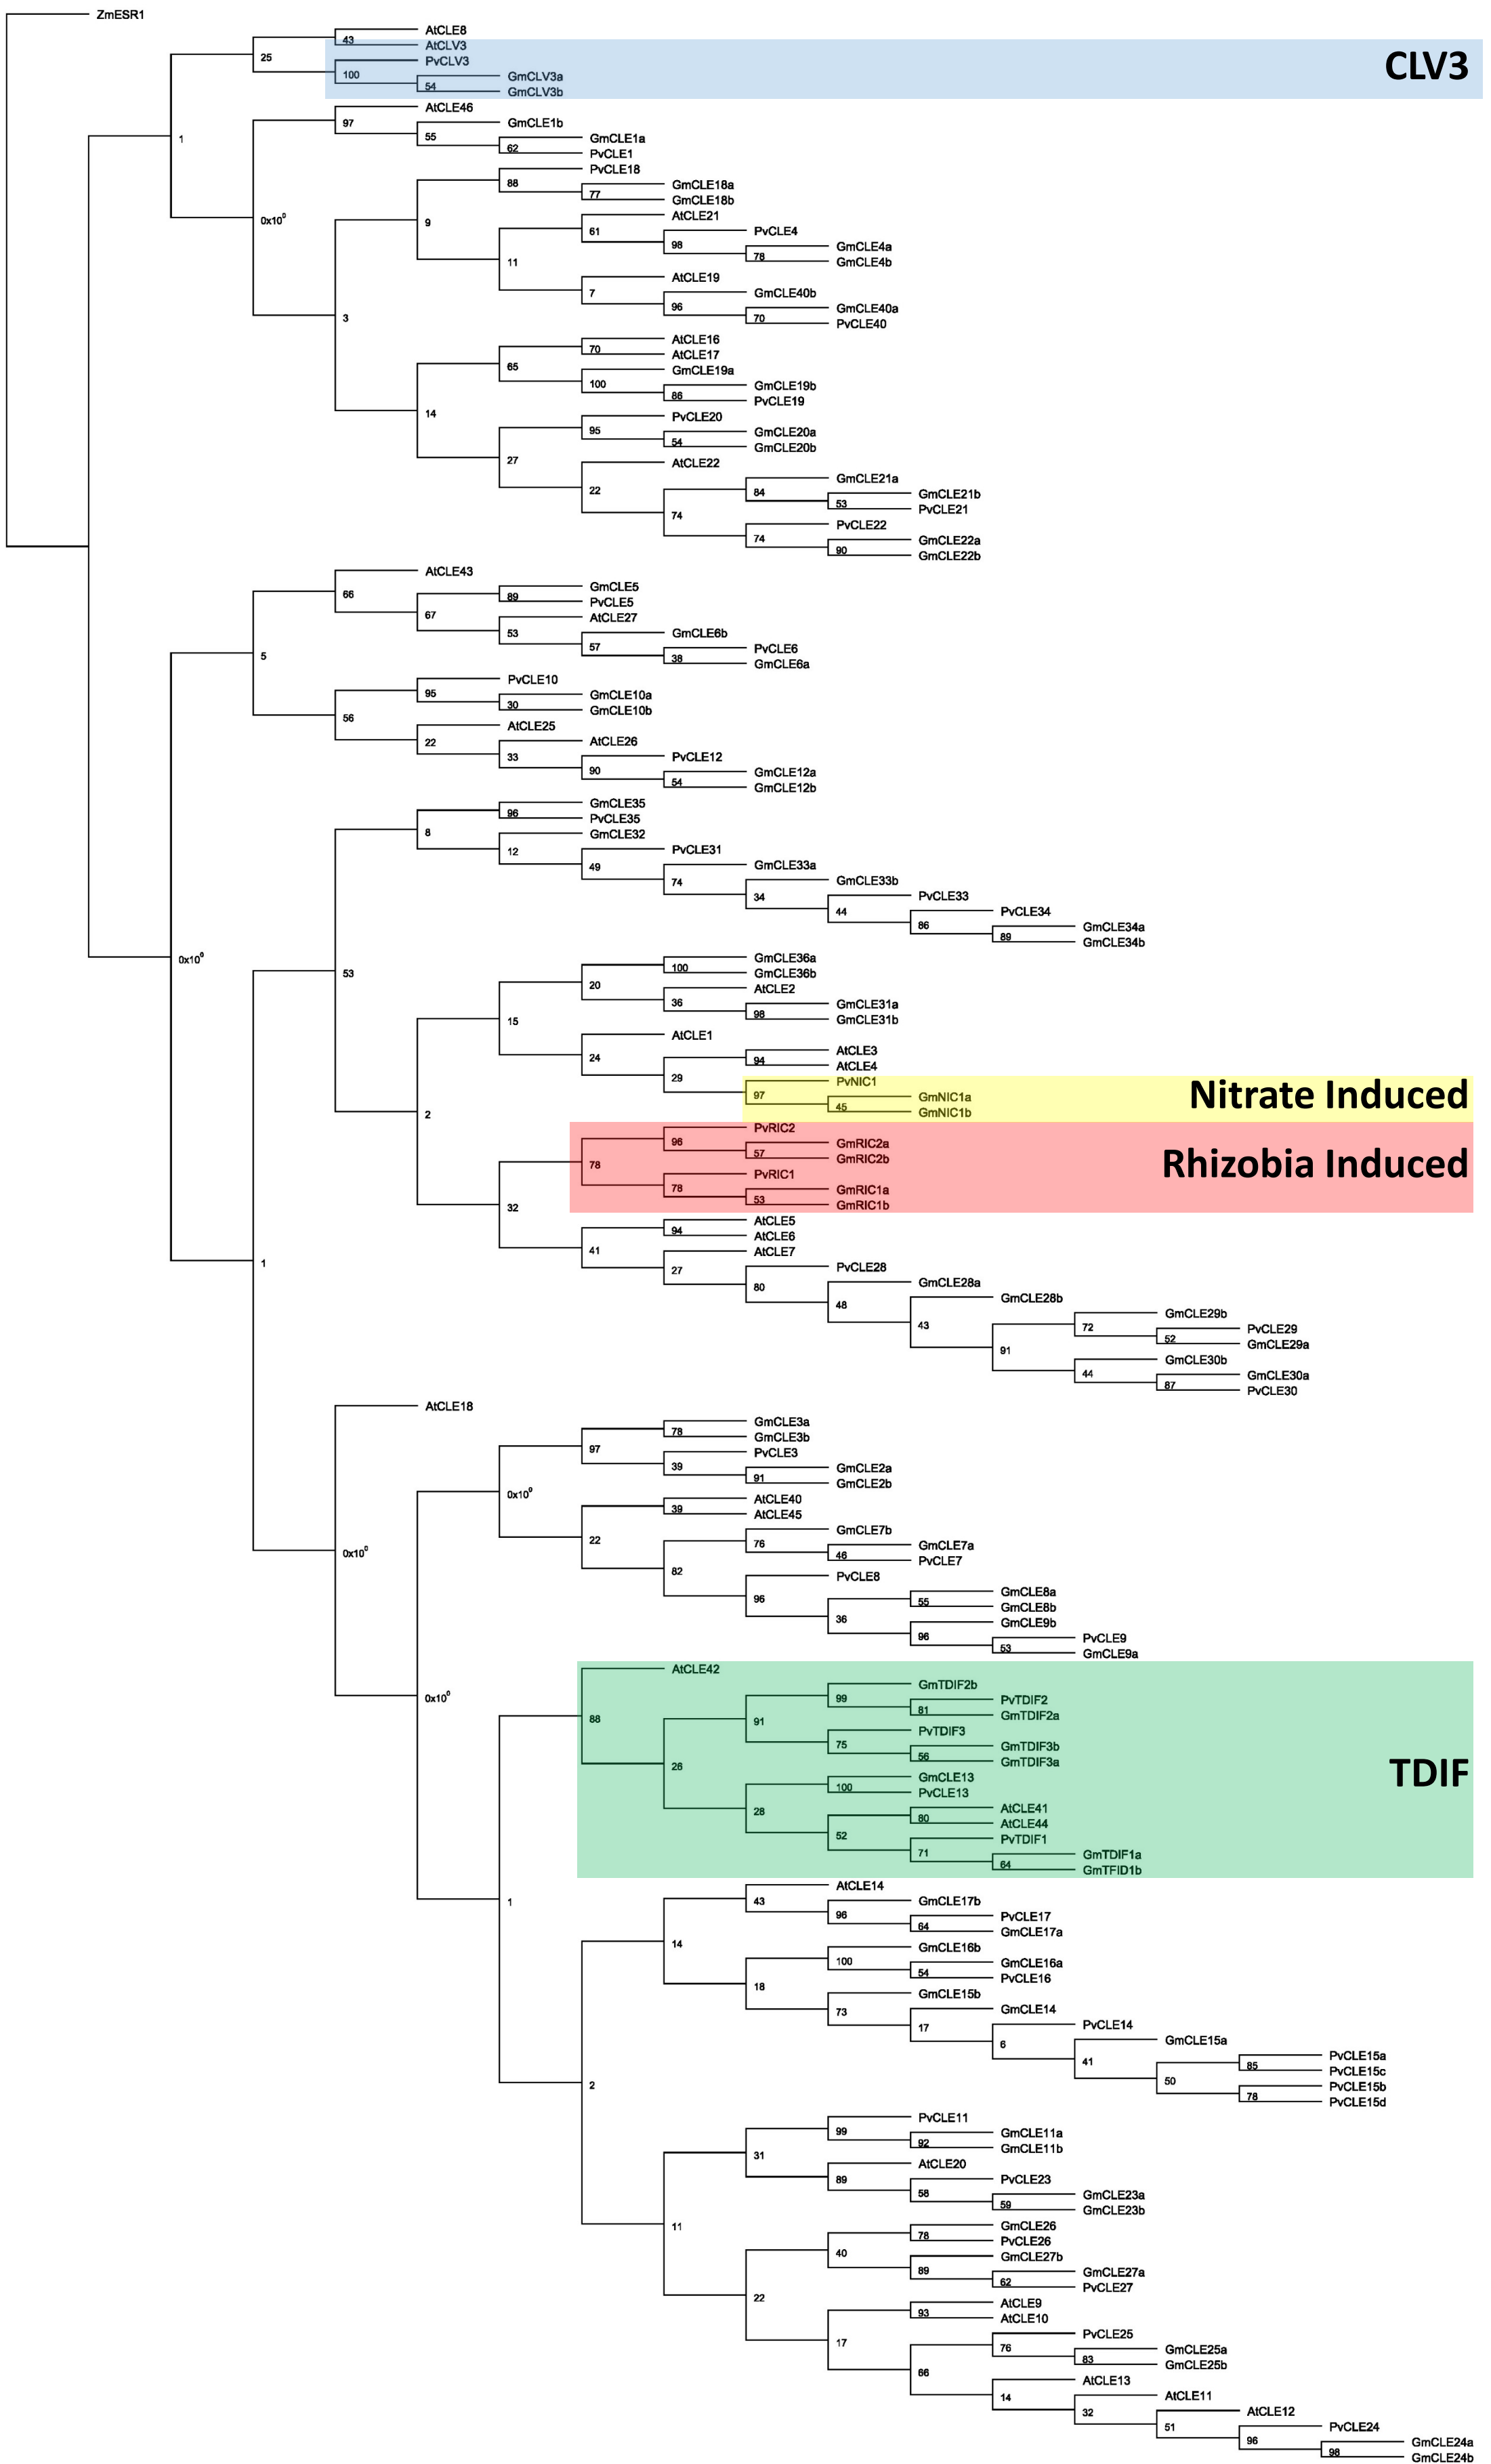

**Supplementary Table 1.** CLE peptide-encoding genes of soybean. Current and prior identifiers are listed, included those assigned here, and those previously used by Cock and McCormick (2001), Oelkers et al. (2008), Mortier et al. (2011), Lim et al. (2012) and Phytozome (v9.1 and earlier versions). Unannotated Phytozome genes are indicated by a location rather than an identifier.

| <b>Gene</b> | <b>Phytozome v10</b>     | <b>Oelkers<br/><i>et al.</i><br/>2008</b> | <b>Mortier<br/><i>et al.</i><br/>2011</b> | <b>Lim et al. 2</b> | <b>uniprot.org</b> | <b>Phytozome v9.1*</b>      | <b>Phytozome<br/>(earlier)</b> |
|-------------|--------------------------|-------------------------------------------|-------------------------------------------|---------------------|--------------------|-----------------------------|--------------------------------|
| CLE30b      | Chr06:36255159..36255402 | -                                         | -                                         | -                   | -                  | Gm06:35,338,629..35,338,872 | Gm06_31873                     |
| CLE30a      | Chr06:36324860..36325095 | -                                         | -                                         | -                   | -                  | Gm06:35,408,408..35,408,644 | Gm06_31924                     |
| CLE33a      | Chr06:36402219..36402452 | -                                         | -                                         | -                   | -                  | Gm06:35,487,426..35,487,680 | -                              |
| CLE14b      | Chr10:46589943..46590137 | -                                         | -                                         | GmCLE10-3           | -                  | Gm10:46,018,999..46,019,250 | Gm10_23522                     |
| CLE40b      | Chr11:9961342..9961800   | -                                         | -                                         | GmCLE11-1           | -                  | Gm11:9,931,027..9,931,338   | Gm11_4314                      |
| CLE22b      | Chr12:27380684..27380911 | -                                         | -                                         | GmCLE12-3           | -                  | Gm12:20,718,769..20,718,996 | Gm12_20250                     |
| CLE29a      | Chr12:27615321..27615566 | -                                         | -                                         | GmCLE12-2           | -                  | Gm12:20,480,965..20,481,210 | -                              |
| CLE28b      | Chr12:38835186..38835383 | -                                         | -                                         | -                   | -                  | Gm12:38,860,090..38,860,190 | -                              |
| CLE34a      | Chr12:38840660..38840902 | -                                         | -                                         | GmCLE12-6           | -                  | Gm12:38,865,464..38,865,706 | Gm12_29982                     |
| CLE35       | Chr13:28564185..28564418 | -                                         | -                                         | GmCLE13-3           | -                  | Gm13:27,370,526..27,370,834 | -                              |
| CLE34b      | Chr13:37353930..37354172 | -                                         | -                                         | GmCLE13-6           | -                  | Gm13:36,212,997..36,213,239 | Gm13_23623                     |
| CLE10a      | Glyma.01G038900          | CLE34#                                    | GmCLE02                                   | Glyma01g04580       | HM585100           | Glyma01g04580               | -                              |
| CLE7a       | Glyma.01G047800          | -                                         | -                                         | GmCLE01-2           | -                  | Glyma01g05805               | Gm01_2140                      |
| CLE27b      | Glyma.01G056400          | -                                         | GmCLE19                                   | Glyma01g06850       | HM585117           | Glyma01g06850               | Gm01_54650                     |
| CLE4a       | Glyma.01G196700          | -                                         | GmCLE33                                   | -                   | HM585131           | Glyma01g40455               | Gm01_26914                     |
| CLE10b      | Glyma.02G025700          | -                                         | GmCLE27                                   | Glyma02g02980       | HM585125           | Glyma02g02980               | Gm02_950                       |
| CLE7b       | Glyma.02G107400          | -                                         | -                                         | GmCLE02-2           | -                  | Glyma02g11955               | Gm02_47475                     |
| CLE27a      | Glyma.02G115000          | -                                         | -                                         | GmCLE02-3           | -                  | Glyma02g12810               | Gm02_47157                     |
| CLE23a      | Glyma.02G270600          | -                                         | GmCLE22                                   | Glyma02g43840       | HM585120           | Glyma02g43840               | Gm02_27580                     |
| CLE21a      | Glyma.02G278000          | -                                         | GmCLE18                                   | Glyma02g44620       | HM585116           | Glyma02g44620               | Gm02_24998                     |
| CLE20a      | Glyma.03G125900          | -                                         | GmCLE38                                   | GmCLE03-1           | HM585136           | Glyma03g28125               | Gm03_18748                     |
| CLE3a       | Glyma.03G238600          | -                                         | -                                         | -                   | -                  | Glyma03g39855               | Gm03_22730                     |
| CLE8b       | Glyma.04G169400          | -                                         | -                                         | Glyma04g33590       | -                  | Glyma04g33590               | Gm04_21157                     |
| CLE25a      | Glyma.05G013600          | -                                         | GmCLE21                                   | Glyma05g07900       | HM585119           | Glyma05g07900               | Gm05_39153                     |
| CLE9a       | Glyma.05G026700          | -                                         | -                                         | -                   | -                  | Gm05:624,302..624,583       | -                              |
| TDIF2a      | Glyma.05G134700          | -                                         | GmCLE31                                   | GmCLE05-2           | HM585129           | Glyma05g26513               | Gm05_25424                     |
| CLE17a      | Glyma.05G205400          | -                                         | GmCLE15                                   | Glyma05g38040       | HM585113           | Glyma05g38040               | Gm05_21288                     |
| CLE8a       | Glyma.06G194000          | -                                         | -                                         | Glyma06g20850       | -                  | Glyma06g20850               | Gm06_41985                     |
| CLE14       | Glyma.06G221500          | -                                         | -                                         | GmCLE06-2           | -                  | Gm06:25,058,794..25,059,051 | Gm06_37797                     |
| CLE29b      | Glyma.06G231800          | -                                         | -                                         | GmCLE06-4           | -                  | Gm06:35,414,419..35,414,655 | Gm06_31921                     |
| RIC2a       | Glyma.06G284100          | -                                         | GmCLE35                                   | GmRIC2              | HM585133           | Glyma06g43681               | Gm06_26406                     |
| CLE31a      | Glyma.07G204600          | -                                         | -                                         | GmCLE07-1           | -                  | Gm07:37,445,715..37,446,035 | -                              |
| CLE19a      | Glyma.07G219600          | -                                         | GmCLE28                                   | Glyma07g34450       | HM585126           | Glyma07g34450               | Gm07_19786                     |
| CLE22a      | Glyma.07G235300          | -                                         | -                                         | GmCLE07-3           | -                  | Glyma07g36331               | Gm07_23512                     |
| CLE17b      | Glyma.08G012300          | CLE63                                     | GmCLE36                                   | GmCLE08-1           | HM585134           | Glyma08g01531               | Gm08_44735                     |
| TDIF2b      | Glyma.08G089800          | CLE51                                     | GmCLE03                                   | Glyma08g09500       | HM585101           | Glyma08g09500               | Gm08_42343                     |
| CLE5        | Glyma.08G262400          | -                                         | GmCLE26                                   | GmCLE08-4           | HM585124           | Glyma08g31522               | Gm08_32800                     |
| TDIF1a      | Glyma.08G355400          | -                                         | -                                         | Glyma08g47020       | -                  | Glyma08g47020               | Gm08_23134                     |
| TDIF3a      | Glyma.09G048500          | -                                         | GmCLE29                                   | Glyma09g05350       | HM585127           | Glyma09g05350               | Gm09_1650                      |
| CLE16a      | Glyma.09G140400          | CLE57                                     | GmCLE09                                   | GmCLE09-2           | HM585107           | Glyma09g25983               | Gm09_16903                     |
| CLE2b       | Glyma.10G154900          | -                                         | GmCLE32                                   | -                   | HM585130           | Glyma10g29595               | Gm10_20454                     |
| CLE24a      | Glyma.10G205100          | -                                         | GmCLE24                                   | Glyma10g34930       | HM585122           | Glyma10g34930               | Gm10_22361                     |
| CLE15a      | Glyma.10G237100          | CLE58                                     | GmCLE10                                   | Glyma10g38160       | HM585108           | Glyma10g38160               | Gm10_23520                     |
| CLE6b       | Glyma.10G274200          | -                                         | GmCLE30                                   | Glyma10g42070       | HM585128           | Glyma10g42070               | Gm10_24702                     |
| CLE4b       | Glyma.11G045000          | -                                         | GmCLE16                                   | -                   | HM585114           | Glyma11g04831               | Gm11_36888                     |
| CLE1a       | Glyma.11G140700          | -                                         | -                                         | -                   | -                  | -                           | -                              |
| CLE40a      | Glyma.12G054900          | CLE61                                     | GmCLE13                                   | GmCLE12-8           | HM585111           | Glyma12g05873               | -                              |
| CLE1b       | Glyma.12G064200          | -                                         | -                                         | -                   | -                  | -                           | -                              |
| RIC2b       | Glyma.12G121800          | -                                         | GmCLE37                                   | GmRIC2-1            | HM585135           | Glyma12g14241               | Gm12_5809                      |
| CLV3a       | Glyma.12G187800          | -                                         | -                                         | GmCLE12-7           | -                  | Glyma12g31336               | -                              |
| NIC1a       | Glyma.12G208900          | -                                         | -                                         | Glyma12g33660       | -                  | Glyma12g33660               | Gm12_18481                     |
| RIC1b       | Glyma.12G209000          | -                                         | GmCLE39                                   | GmCLE12-4           | HM585137           | Glyma12g33665               | -                              |
| CLE12a      | Glyma.13G067000          | -                                         | -                                         | GmCLE13-2           | -                  | Glyma13g04895               | Gm13_37953                     |
| CLE18a      | Glyma.13G103000          | -                                         | -                                         | GmCLE13-1           | -                  | Glyma13g00291               | Gm13_40112                     |
| CLE32       | Glyma.13G171400          | -                                         | -                                         | -                   | -                  | Glyma13g24026               | -                              |
| CLE31b      | Glyma.13G171500          | -                                         | -                                         | GmCLE13-4           | -                  | Gm13:27,376,809..27,377,129 | -                              |
| CLE36a      | Glyma.13G232300          | -                                         | -                                         | -                   | -                  | Gm13:33,138,563..33,138,790 | Gm13_24802                     |
| CLE13       | Glyma.13G263500          | -                                         | -                                         | Glyma13g33855       | -                  | Glyma13g33855               | Gm13_16736                     |

| Gene   | Phytozome v10   | Oelkers<br><i>et al.</i><br>2008 | Mortier<br><i>et al.</i><br>2011 | Lim et al. 2  | uniprot.org | Phytozome v9.1*             | Phytozome<br>(earlier) |
|--------|-----------------|----------------------------------|----------------------------------|---------------|-------------|-----------------------------|------------------------|
| CLE28a | Glyma.13G271600 | -                                | -                                | GmCLE13-5     | -           | Glyma13g34685               | Gm13_23624             |
| RIC1a  | Glyma.13G292300 | CLE62                            | GmCLE14                          | GmRIC1        | HM585112    | Glyma13g36831               | Gm13_22918             |
| NIC1b  | Glyma.13G292400 | -                                | -                                | GmCLE13-8     | -           | Gm13:38,047,909..38,048,152 | -                      |
| CLV3b  | Glyma.13G313400 | -                                | -                                | GmCLE13-9     | -           | Glyma13g38975               | -                      |
| CLE21b | Glyma.14G036500 | -                                | GmCLE23                          | Glyma14g04100 | HM585121    | Glyma14g04100               | Gm14_50653             |
| CLE23b | Glyma.14G046400 | CLE23#                           | GmCLE01                          | Glyma14g05080 | HM585099    | Glyma14g05080               | Gm14_1542              |
| CLE11a | Glyma.14G087000 | CLE59                            | GmCLE11                          | Glyma14g09600 | HM585109    | Glyma14g09600               | Gm14_48657             |
| CLE36b | Glyma.15G080400 | -                                | -                                | -             | -           | Gm15:6,143,084..6,143,314   | Gm15_2583              |
| TDIF3b | Glyma.15G155800 | CLE60                            | GmCLE12                          | Glyma15g16720 | HM585110    | Glyma15g16720               | Gm15_5414              |
| CLE16b | Glyma.16G194300 | -                                | -                                | GmCLE16-1     | -           | Glyma16g31896               | Gm16_17018             |
| CLE18b | Glyma.17G056000 | -                                | -                                | -             | -           | Gm17:4,528,349..4,528,594   | -                      |
| CLE9b  | Glyma.17G100200 | -                                | -                                | Glyma17g10850 | -           | Glyma17g10850               | Gm17_37443             |
| CLE25b | Glyma.17G121800 | -                                | GmCLE20                          | Glyma17g13100 | HM585118    | Glyma17g13100               | Gm17_4155              |
| CLE11b | Glyma.17G237400 | -                                | GmCLE34                          | Glyma17g35570 | HM585132    | Glyma17g35570               | Gm17_19258             |
| TDIF1b | Glyma.18G171800 | CLE53                            | GmCLE05                          | Glyma18g37720 | HM585103    | Glyma18g37720               | Gm18_39105             |
| CLE12b | Glyma.19G017400 | -                                | -                                | GmCLE19-1     | -           | Glyma19g02051               | Gm19_51075             |
| CLE20b | Glyma.19G128400 | CLE54                            | GmCLE06                          | GmCLE19-2     | HM585104    | Glyma19g30865               | Gm19_20810             |
| CLE3b  | Glyma.19G236000 | -                                | -                                | -             | -           | Glyma19g42415               | Gm19_24858             |
| CLE19b | Glyma.20G017800 | CLE56                            | GmCLE08                          | Glyma20g02180 | HM585106    | Glyma20g02191               | Gm20_735               |
| CLE26  | Glyma.20G027000 | -                                | GmCLE25                          | Glyma20g03290 | HM585123    | Glyma20g03290               | Gm20_1302              |
| CLE22b | Glyma.20G042900 | -                                | -                                | GmCLE20-3     | -           | Glyma20g08353               | Gm20_41593             |
| CLE6a  | Glyma.20G115800 | CLE55                            | GmCLE07                          | Glyma20g24960 | HM585105    | Glyma20g24960               | Gm20_28992             |
| CLE24b | Glyma.20G185400 | CLE52                            | GmCLE04                          | Glyma20g32640 | HM585102    | Glyma20g32640               | Gm20_26402             |
| CLE2a  | Glyma.20G233400 | -                                | GmCLE17                          | -             | HM585115    | Glyma20g37711               | Gm20_24666             |
| CLE37a | Glyma.16G047700 | -                                | -                                | -             | -           | -                           | -                      |
| CLE37b | Glyma.19G103800 | -                                | -                                | -             | -           | -                           | -                      |

# Original identifiers used by Cock and McCormick (2001)

\* Identifier also used by soybase.org

**Supplementary Table 2.** Frequency (%) of amino acid residues in CLE prepropeptides of soybean, common bean and Arabidopsis.

| Amino Acid | <i>G. max</i><br>and <i>P. vulgaris</i> | <i>G. max</i> | <i>P. vulgaris</i> | <i>A. thaliana</i> |
|------------|-----------------------------------------|---------------|--------------------|--------------------|
| Ala        | 5.1                                     | 5.1           | 5.0                | 4.4                |
| Cys        | 1.3                                     | 1.3           | 1.2                | 0.8                |
| Asp        | 2.9                                     | 2.8           | 2.9                | 3.8                |
| Glu        | 3.9                                     | 4.0           | 3.6                | 4.7                |
| Phe        | 5.2                                     | 5.2           | 5.2                | 5.0                |
| Gly        | 5.3                                     | 5.5           | 5.1                | 5.4                |
| His        | 5.3                                     | 5.2           | 5.6                | 4.3                |
| Ile        | 4.8                                     | 4.8           | 4.9                | 5.2                |
| Lys        | 6.2                                     | 6.2           | 6.3                | 5.8                |
| Leu        | 11.4                                    | 11.3          | 11.5               | 11.4               |
| Met        | 2.9                                     | 2.9           | 3.0                | 3.1                |
| Asn        | 5.3                                     | 5.4           | 5.2                | 4.6                |
| Pro        | 6.6                                     | 6.5           | 6.8                | 7.0                |
| Gln        | 3.4                                     | 3.3           | 3.5                | 2.6                |
| Arg        | 6.3                                     | 6.4           | 6.0                | 8.5                |
| Ser        | 11.3                                    | 11.2          | 11.4               | 10.3               |
| Thr        | 5.1                                     | 5.0           | 5.3                | 4.9                |
| Val        | 5.7                                     | 5.7           | 5.6                | 5.7                |
| Trp        | 0.7                                     | 0.7           | 0.6                | 0.6                |
| Tyr        | 1.3                                     | 1.3           | 1.4                | 2.0                |

**Supplementary Table 3. Soybean CLE peptide-encoding gene expression from transcriptome databases.**

| Gene   | Group | Root Hair 12HAI | Roothair_12HAI/moock | Root Hair 24 HAI | Roothair_24HAI/moock | Root Hair 48 HAI | Roothair_48HAI/moock | Root Hair 48 HAI Stripped | SAM | Green Pods | Root_tip | Flower | Leaves | Nodule | Root | one cm pod | pod shell 10DAF | pod shell 14DAF | seed 10DAF | seed 14DAF | seed 21DAF | seed 25DAF | seed 28DAF | seed 35DAF | seed 42DAF | Source |   |   |   |   |   |   |   |   |   |   |   |
|--------|-------|-----------------|----------------------|------------------|----------------------|------------------|----------------------|---------------------------|-----|------------|----------|--------|--------|--------|------|------------|-----------------|-----------------|------------|------------|------------|------------|------------|------------|------------|--------|---|---|---|---|---|---|---|---|---|---|---|
| CLE1b  | II    | 0               | 0                    | 0                | 0                    | 0                | 0                    | 0.3                       | 0   | 0          | 0        | 1.5    | 0      | 0      | 3.4  | 0          | 0               | 0               | 0          | 0          | 0          | 0          | 0          | 0          | 0          | 1      |   |   |   |   |   |   |   |   |   |   |   |
| CLE6a  | II    | 0.8             | 2.5                  | 3.6              | 2.2                  | 1.8              | 2.9                  | 2.1                       | 0.5 | 0.7        | 2.5      | 1.2    | 2.8    | 1.1    | 3.2  | 0          | 0               | 0               | 0          | 0          | 0          | 0          | 0          | 0          | 0          | 1      |   |   |   |   |   |   |   |   |   |   |   |
| CLE6b  | II    | 0.8             | 1.4                  | 0.8              | 0.3                  | 1.8              | 1.2                  | 1.3                       | 0.5 | 0.7        | 1.5      | 0.9    | 0.4    | 0.3    | 1.8  | 0          | 1               | 1               | 0          | 0          | 0          | 0          | 0          | 0          | 0          | 1      |   |   |   |   |   |   |   |   |   |   |   |
| CLE8a  | II    | 0               | 0                    | 0                | 0                    | 0                | 0                    | 0                         | 0.3 | 0          | 0        | 0      | 0      | 0      | 0.3  | 0          | 3               | 2               | 0          | 0          | 0          | 0          | 0          | 0          | 0          | 1      |   |   |   |   |   |   |   |   |   |   |   |
| CLE8b  | II    | 0               | 0                    | 0                | 0                    | 0.3              | 0.2                  | 0.8                       | 0   | 0          | 0        | 0      | 0      | 0      | 0.3  | 0          | 1               | 1               | 0          | 0          | 0          | 0          | 0          | 0          | 0          | 1      |   |   |   |   |   |   |   |   |   |   |   |
| CLE9b  | II    | 0               | 0.4                  | 0.3              | 0                    | 0.3              | 0.2                  | 0.3                       | 0.5 | 0.7        | 0        | 0.3    | 0      | 0      | 1.1  | 0          | 1               | 1               | 0          | 0          | 0          | 1          | 0          | 0          | 0          | 1      |   |   |   |   |   |   |   |   |   |   |   |
| CLE10a | II    | 0.4             | 0                    | 0.3              | 0                    | 0.6              | 0.2                  | 1.8                       | 4.8 | 0.7        | 0.3      | 4.2    | 2.1    | 0.8    | 6.1  | 0          | 1               | 1               | 1          | 1          | 1          | 1          | 1          | 1          | 1          | 1      |   |   |   |   |   |   |   |   |   |   |   |
| CLE10b | II    | 0               | 0.4                  | 0                | 0.3                  | 0.3              | 0                    | 1.3                       | 0.8 | 1.4        | 0.3      | 5      | 1.8    | 0      | 2.6  | 0          | 1               | 1               | 1          | 1          | 1          | 1          | 1          | 1          | 1          | 1      |   |   |   |   |   |   |   |   |   |   |   |
| CLE11a | II    | 0.8             | 0                    | 0.3              | 0                    | 0                | 0                    | 0                         | 0.5 | 0          | 0        | 0      | 0      | 0.3    | 0.8  | 0          | 0               | 0               | 1          | 0          | 0          | 0          | 0          | 0          | 0          | 1      |   |   |   |   |   |   |   |   |   |   |   |
| CLE11b | II    | 0               | 0                    | 0.6              | 0                    | 0.6              | 0.7                  | 0                         | 0.8 | 0          | 0        | 0.3    | 0      | 1.6    | 2.1  | 0          | 0               | 0               | 1          | 0          | 0          | 0          | 0          | 0          | 0          | 1      |   |   |   |   |   |   |   |   |   |   |   |
| CLE17a | IV    | 2.8             | 3.9                  | 0.8              | 1.9                  | 1.5              | 4.4                  | 2.1                       | 0   | 0          | 0        | 0      | 0.4    | 0.5    | 1.8  | 0          | 1               | 0               | 0          | 0          | 0          | 0          | 0          | 0          | 0          | 1      |   |   |   |   |   |   |   |   |   |   |   |
| CLE19a | V     | 1.6             | 1.4                  | 1.7              | 1.1                  | 0.9              | 1                    | 1.6                       | 5.8 | 4.8        | 0.9      | 1.8    | 0.7    | 0      | 0.3  | 8          | 24              | 0               | 1          | 16         | 13         | 11         | 1          | 2          | 5          | 1      | 0 | 1 | 0 |   |   |   |   |   |   |   |   |
| CLE21a | V     | 0               | 0                    | 0                | 0.3                  | 0                | 0                    | 0                         | 1   | 0          | 0        | 0.3    | 0      | 0      | 0.5  | 0          | 1               | 1               | 0          | 1          | 4          | 3          | 2          | 2          | 2          | 2      | 1 | 1 | 2 |   |   |   |   |   |   |   |   |
| CLE21b | V     | 0               | 0                    | 0                | 1.1                  | 0.3              | 0.5                  | 0.3                       | 1.8 | 0          | 0        | 0      | 0      | 0      | 0.8  | 1          | 3               | 0               | 1          | 1          | 0          | 3          | 4          | 3          | 11         | 4      | 1 | 1 | 2 |   |   |   |   |   |   |   |   |
| CLE23a | V     | 2               | 0.4                  | 1.4              | 1.4                  | 0                | 0                    | 0                         | 0   | 0          | 0.9      | 0      | 1.1    | 0      | 0.8  | 0          | 2               | 1               | 0          | 0          | 1          | 1          | 0          | 0          | 0          | 1      | 0 | 0 | 0 | 1 |   |   |   |   |   |   |   |
| CLE23b | V     | 4               | 4.9                  | 3.3              | 2.5                  | 3.1              | 4.9                  | 6.7                       | 0.8 | 0.7        | 1.5      | 0.6    | 1.4    | 2.4    | 6.1  | 1          | 0               | 2               | 6          | 2          | 3          | 5          | 2          | 3          | 1          | 2      | 1 | 2 | 0 | 1 |   |   |   |   |   |   |   |
| CLE24a | V     | 0               | 0                    | 0                | 0                    | 0                | 0                    | 0                         | 0   | 0          | 0.3      | 0.3    | 0      | 0      | 0.3  | 0          | 0               | 0               | 0          | 1          | 0          | 0          | 0          | 0          | 0          | 0      | 0 | 0 | 0 | 1 | 1 |   |   |   |   |   |   |
| CLE24b | V     | 0.4             | 0                    | 0.8              | 0.3                  | 0.6              | 1.5                  | 0.3                       | 0   | 0          | 0.6      | 0      | 0      | 0      | 1.3  | 0          | 0               | 0               | 0          | 0          | 0          | 0          | 0          | 0          | 0          | 0      | 0 | 0 | 0 | 0 | 1 | 1 |   |   |   |   |   |
| CLE25a | V     | 13              | 9.5                  | 9.2              | 17                   | 8.9              | 10                   | 0.3                       | 0   | 0          | 6.8      | 0      | 0      | 0      | 4.5  | 0          | 0               | 0               | 12         | 0          | 0          | 0          | 0          | 0          | 0          | 0      | 0 | 0 | 0 | 0 | 1 | 1 |   |   |   |   |   |
| CLE25b | V     | 17              | 16.3                 | 9.2              | 13.6                 | 7.4              | 9.8                  | 0.5                       | 0   | 0          | 0        | 4      | 0      | 0.3    | 6.1  | 0          | 0               | 0               | 0          | 1          | 6          | 0          | 0          | 0          | 0          | 0      | 0 | 0 | 0 | 0 | 1 | 1 |   |   |   |   |   |
| CLE26  | V     | 0               | 0                    | 0                | 0.3                  | 0                | 0                    | 0                         | 0   | 0          | 0        | 0.6    | 0      | 0      | 0    | 0          | 2               | 0               | 0          | 0          | 0          | 0          | 1          | 0          | 0          | 0      | 3 | 2 | 1 | 1 | 1 | 1 | 1 |   |   |   |   |
| CLE27a | V     | 0               | 0                    | 0                | 0                    | 0                | 0.2                  | 0.3                       | 0   | 0          | 0        | 0.6    | 1.1    | 0      | 0    | 0          | 5               | 1               | 0          | 0          | 0          | 1          | 1          | 1          | 0          | 0      | 2 | 0 | 0 | 0 | 0 | 1 | 1 |   |   |   |   |
| CLE27b | V     | 0               | 0                    | 0                | 0                    | 0                | 0                    | 0                         | 0.3 | 0          | 0        | 0      | 1.8    | 0      | 0    | 4          | 5               | 0               | 0          | 0          | 0          | 1          | 1          | 1          | 1          | 3      | 0 | 0 | 0 | 0 | 0 | 1 | 1 |   |   |   |   |
| TDIF2b | III   | 0.4             | 0                    | 0                | 0.3                  | 0                | 0                    | 0.8                       | 2.3 | 4.1        | 0        | 0      | 0      | 0.3    | 0.8  | 4          | 4               | 0               | 0          | 9          | 11         | 11         | 4          | 3          | 3          | 2      | 1 | 1 | 0 | 0 | 1 | 1 | 1 | 2 |   |   |   |
| TDIF1a | III   | 24              | 45                   | 29               | 34                   | 17               | 20                   | 22                        | 18  | 33         | 3.1      | 28     | 11     | 5.6    | 30   | 29         | 16              | 5               | 9          | 16         | 13         | 10         | 1          | 2          | 4          | 3      | 2 | 2 | 2 | 2 | 2 | 2 | 2 | 2 |   |   |   |
| TDIF1b | III   | 1.6             | 1.4                  | 2.5              | 2.2                  | 0.6              | 1.7                  | 23                        | 30  | 16         | 0        | 8.6    | 0.7    | 9.8    | 18   | 13         | 6               | 4               | 6          | 11         | 9          | 9          | 1          | 2          | 2          | 3      | 1 | 3 | 0 | 0 | 0 | 0 | 1 | 1 | 2 |   |   |
| TDIF3a | III   | 0               | 0                    | 0                | 0                    | 0                | 0                    | 0.5                       | 0   | 0.7        | 0        | 0.9    | 0      | 0      | 0.3  | 3          | 3               | 0               | 0          | 0          | 0          | 0          | 0          | 1          | 0          | 4      | 3 | 3 | 2 | 0 | 0 | 1 | 1 | 1 | 1 | 2 |   |
| TDIF3b | III   | 0               | 0                    | 0                | 0                    | 0                | 0                    | 0.8                       | 2   | 1.4        | 0        | 0.6    | 0      | 0      | 0    | 4          | 1               | 0               | 0          | 0          | 0          | 0          | 0          | 1          | 1          | 0      | 0 | 0 | 0 | 0 | 1 | 1 | 1 | 1 | 1 | 1 | 2 |

**1** Soybean eFP Browser (<http://bar.utoronto.ca/efpsoybean/cgi-bin/efpWeb.cgi>) with values presented as absolute RPKM (Reads/kilobase/million) expression. **2** Soybase RNA-Seq Atlas (<http://www.soybase.org/soyseq/>) with values presented as normalised RPKM expression.

**Supplementary Table 4.** Common bean CLE peptide-encoding gene expression from A Common Bean Gene Expression Atlas (Jamie et al. 2014). Gene expression is displayed as normalised RPKM (Reads/kilobase/million) values.

| Gene    | Grp | YL | L5 | LF | LE | LI | YS | ST | FY  | PY | PH | P1 | P2 | SH | S1 | S2 | RT | YR | R5 | RF | RE | RI | N5  | NE | NI |
|---------|-----|----|----|----|----|----|----|----|-----|----|----|----|----|----|----|----|----|----|----|----|----|----|-----|----|----|
| PvCLE3  | II  | 0  | 0  | 1  | 1  | 2  | 2  | 0  | 0   | 0  | 1  | 0  | 2  | 0  | 0  | 0  | 0  | 0  | 0  | 0  | 0  | 0  | 0   | 0  | 0  |
| PvCLE4  | II  | 0  | 0  | 0  | 0  | 0  | 0  | 2  | 1   | 0  | 0  | 0  | 0  | 1  | 1  | 0  | 1  | 0  | 7  | 7  | 1  | 3  | 2   | 0  | 0  |
| PvCLE5  | II  | 1  | 0  | 1  | 0  | 0  | 0  | 0  | 1   | 0  | 3  | 0  | 0  | 0  | 0  | 0  | 0  | 0  | 0  | 0  | 0  | 0  | 1   | 0  | 0  |
| PvCLE6  | II  | 7  | 8  | 6  | 4  | 3  | 2  | 5  | 1   | 1  | 3  | 2  | 3  | 0  | 2  | 2  | 21 | 24 | 21 | 13 | 13 | 12 | 12  | 5  | 8  |
| PvCLE7  | II  | 3  | 2  | 1  | 1  | 1  | 1  | 3  | 2   | 1  | 2  | 1  | 1  | 1  | 1  | 0  | 1  | 3  | 3  | 3  | 1  | 1  | 1   | 1  | 1  |
| PvCLE8  | II  | 1  | 0  | 0  | 0  | 0  | 1  | 2  | 0   | 0  | 0  | 0  | 0  | 0  | 0  | 1  | 0  | 0  | 1  | 0  | 0  | 0  | 0   | 0  | 0  |
| PvCLE9  | II  | 0  | 0  | 0  | 0  | 0  | 0  | 0  | 0   | 0  | 0  | 0  | 0  | 0  | 0  | 0  | 0  | 0  | 0  | 0  | 0  | 0  | 0   | 0  | 0  |
| PvCLE10 | II  | 5  | 7  | 9  | 6  | 13 | 26 | 9  | 9   | 1  | 6  | 4  | 21 | 9  | 2  | 5  | 3  | 7  | 15 | 20 | 8  | 12 | 3   | 3  | 18 |
| PvCLE11 | II  | 5  | 2  | 1  | 0  | 0  | 10 | 18 | 2   | 0  | 2  | 1  | 1  | 1  | 1  | 0  | 3  | 2  | 6  | 5  | 5  | 7  | 27  | 13 | 14 |
| PvCLE12 | II  | 2  | 1  | 0  | 0  | 0  | 9  | 8  | 4   | 0  | 0  | 0  | 0  | 3  | 3  | 2  | 1  | 2  | 9  | 8  | 3  | 3  | 0   | 0  | 0  |
| PvCLE14 | IV  | 0  | 0  | 0  | 0  | 0  | 0  | 0  | 0   | 0  | 0  | 0  | 0  | 0  | 0  | 0  | 0  | 0  | 1  | 1  | 1  | 1  | 0   | 0  | 1  |
| PvCLE16 | IV  | 7  | 6  | 29 | 12 | 10 | 6  | 13 | 30  | 13 | 29 | 14 | 39 | 2  | 2  | 1  | 0  | 2  | 3  | 2  | 3  | 3  | 1   | 1  | 15 |
| PvCLE17 | IV  | 1  | 3  | 6  | 5  | 2  | 6  | 1  | 0   | 0  | 0  | 3  | 6  | 0  | 0  | 0  | 0  | 5  | 2  | 2  | 2  | 5  | 2   | 3  | 4  |
| PvCLE18 | V   | 0  | 0  | 0  | 0  | 0  | 0  | 0  | 0   | 0  | 0  | 0  | 0  | 0  | 0  | 0  | 0  | 0  | 0  | 0  | 0  | 0  | 0   | 0  | 0  |
| PvCLE19 | V   | 14 | 5  | 6  | 3  | 3  | 1  | 7  | 6   | 1  | 3  | 1  | 2  | 12 | 4  | 2  | 11 | 3  | 3  | 4  | 5  | 2  | 10  | 0  | 0  |
| PvCLE20 | V   | 3  | 1  | 1  | 0  | 1  | 24 | 10 | 5   | 0  | 0  | 0  | 0  | 3  | 2  | 1  | 0  | 2  | 2  | 2  | 4  | 10 | 2   | 1  | 0  |
| PvCLE21 | V   | 0  | 0  | 0  | 0  | 0  | 0  | 0  | 0   | 0  | 0  | 0  | 0  | 1  | 0  | 0  | 0  | 0  | 0  | 0  | 0  | 0  | 0   | 0  | 0  |
| PvCLE22 | V   | 0  | 0  | 0  | 0  | 0  | 0  | 0  | 0   | 0  | 0  | 0  | 0  | 0  | 0  | 0  | 0  | 0  | 0  | 0  | 0  | 0  | 0   | 0  | 0  |
| PvCLE23 | V   | 26 | 58 | 3  | 8  | 35 | 25 | 11 | 1   | 2  | 43 | 5  | 7  | 6  | 1  | 1  | 7  | 57 | 59 | 6  | 33 | 67 | 28  | 11 | 28 |
| PvCLE24 | V   | 1  | 1  | 1  | 1  | 0  | 5  | 0  | 0   | 0  | 1  | 0  | 0  | 0  | 0  | 0  | 0  | 0  | 1  | 1  | 1  | 1  | 0   | 0  | 0  |
| PvCLE25 | V   | 0  | 1  | 0  | 0  | 0  | 0  | 2  | 1   | 0  | 0  | 0  | 0  | 2  | 5  | 6  | 42 | 55 | 30 | 25 | 25 | 13 | 21  | 6  | 63 |
| PvCLE26 | V   | 23 | 32 | 14 | 11 | 14 | 7  | 10 | 10  | 5  | 16 | 3  | 4  | 44 | 23 | 17 | 1  | 0  | 2  | 0  | 2  | 2  | 0   | 0  | 0  |
| PvCLE27 | V   | 5  | 3  | 4  | 4  | 5  | 0  | 0  | 2   | 0  | 0  | 1  | 5  | 1  | 1  | 0  | 0  | 0  | 0  | 0  | 1  | 0  | 0   | 0  | 0  |
| PvCLE28 | VII | 0  | 0  | 0  | 0  | 0  | 0  | 0  | 0   | 0  | 0  | 0  | 0  | 0  | 0  | 0  | 2  | 6  | 5  | 1  | 1  | 0  | 0   | 0  | 0  |
| PvCLE29 | VII | 0  | 0  | 0  | 0  | 0  | 0  | 0  | 160 | 0  | 0  | 0  | 0  | 0  | 0  | 0  | 0  | 0  | 0  | 0  | 0  | 0  | 0   | 0  | 0  |
| PvCLE40 | I   | 0  | 0  | 0  | 0  | 0  | 0  | 0  | 0   | 0  | 0  | 0  | 0  | 0  | 0  | 0  | 0  | 0  | 0  | 0  | 0  | 0  | 0   | 0  | 0  |
| PvCLV3  | I   | 0  | 0  | 0  | 0  | 0  | 0  | 0  | 0   | 0  | 0  | 0  | 0  | 0  | 0  | 0  | 0  | 0  | 0  | 0  | 0  | 0  | 0   | 0  | 0  |
| PvNIC1  | VII | 0  | 0  | 0  | 0  | 0  | 0  | 0  | 0   | 0  | 0  | 0  | 0  | 0  | 0  | 0  | 0  | 1  | 4  | 4  | 1  | 0  | 9   | 11 | 0  |
| PvRIC1  | VI  | 0  | 0  | 0  | 0  | 0  | 0  | 0  | 0   | 0  | 0  | 0  | 0  | 0  | 0  | 0  | 0  | 1  | 1  | 0  | 2  | 1  | 21  | 0  | 0  |
| PvRIC2  | VI  | 0  | 2  | 0  | 0  | 0  | 0  | 0  | 0   | 0  | 0  | 0  | 0  | 0  | 0  | 0  | 0  | 0  | 0  | 3  | 19 | 21 | 163 | 5  | 11 |
| PvTDIF1 | III | 21 | 11 | 10 | 9  | 79 | 72 | 35 | 25  | 7  | 35 | 15 | 46 | 9  | 16 | 7  | 6  | 12 | 43 | 25 | 20 | 51 | 30  | 11 | 34 |
| PvTDIF2 | III | 1  | 1  | 1  | 1  | 0  | 4  | 5  | 4   | 2  | 16 | 5  | 13 | 4  | 1  | 1  | 0  | 1  | 1  | 1  | 1  | 1  | 0   | 0  | 0  |
| PvTDIF3 | III | 0  | 0  | 0  | 0  | 0  | 0  | 2  | 1   | 1  | 3  | 1  | 1  | 3  | 1  | 0  | 0  | 0  | 0  | 0  | 0  | 0  | 0   | 0  | 0  |

**Tissue type key:**

- YL- Fully expanded 2nd trifoliolate leaf tissue from plants provided with fertiliser
- L5- Leaf tissue collected 5 days after plants were inoculated with effective rhizobium
- LF- Leaf tissue from fertilised plants collected at the same time of LE and LI
- LE- Leaf tissue collected 21 days after plants were inoculated with effective rhizobium
- LI- Leaf tissue collected 21 days after plants were inoculated with ineffective rhizobium
- YS- All stem internodes above the cotyledon collected at the 2nd trifoliolate stage
- ST- Shoot tip, including the apical meristem, collected at the 2nd trifoliolate stage
- FY- Young flowers, collected prior to floral emergence
- PY- Young pods, collected 1 to 4 days after floral senescence. Samples contain developing embryos at globular stage
- PH- Pods approximately 9cm long, associated with seeds at heart stage (pod only)
- P1- Pods between 10 and 11 cm long, associated with stage 1 seeds (pod only)
- P2- Pods between 12 and 13 cm long associated with stage 2 seeds (pod only)
- SH- Heart stage seeds, between 3 and 4 mm across and approximately 7 mg
- S1- Stage 1 seeds, between 6 and 7 mm across and approximately 50 mg
- S2- Stage 2 seeds, between 8 and 10 mm across and between 140 and 150 mg
- RT- Root tips, 0.5 cm of tissue, collected from fertilized plants at 2nd trifoliolate stage of development.
- YR- Whole roots, including root tips, collected at the 2nd trifoliolate stage of development
- R5- Whole roots separated from 5 day old pre-fixing nodules
- RF- Whole roots from fertilized plants collected at the same time as RE and RI
- RE- Whole roots separated from fix+ nodules collected 21 days after inoculation
- RI- Whole roots separated from fix- nodules collected 21 days after inoculation
- N5- Pre-fixing (effective) nodules collected 5 days after inoculation
- NE- Effectively fixing nodules collected 21 days after inoculation
- NI- Ineffectively fixing nodules collected 21 days after inoculation

**Supplementary Table 5. *Arabidopsis thaliana* CLE peptide-encoding gene expression.** Gene expression is displayed as normalised log2-transformed values (4.1 = 17 fold).

| Research Area | Dev   |      |        |        |        |       |        |             |      |            |         |      | Poll     | Sd+Sq     | Sd+Sq      | PhCh   | PhCh   | PhCh   | CAGE | CAGE | CAGE | MS      | MS      | MS   | MS   | MS      | MS      | MS   | MS   |
|---------------|-------|------|--------|--------|--------|-------|--------|-------------|------|------------|---------|------|----------|-----------|------------|--------|--------|--------|------|------|------|---------|---------|------|------|---------|---------|------|------|
|               | 1     | 1    | 1.09   | 1.11   | 1.12   | 6.1   | 1.1    | 1.09        | 1    | 1          | 1       | 1.04 | 6.5      | 9.7       | 9.7        | 1      | 1.03   | 1.09   | 1.03 | 3.7  | 1.03 | 1.09    | 1.09    | 1    | 1    | 1       | 1       | 1.09 | 1.09 |
| Growth Stage  | Dev   |      |        |        |        |       |        |             |      |            |         |      | Poll     | Sd+Sq     | Sd+Sq      | PhCh   | PhCh   | PhCh   | CAGE | CAGE | CAGE | MS      | MS      | MS   | MS   | MS      | MS      | MS   | MS   |
| Tissue        | Cotyl | Hyp1 | FlwRos | FlwRos | FlwRos | SenLf | CaulLf | ShoApx.Infl | Root | ShoApx.Veg | SdIngrm | Root | Mat.Poll | Seed3+Sil | Seed10-Sil | VegRos | VegRos | VegRos | Lf   | Flw  | Root | SdIngrm | SdIngrm | Root | Root | SdIngrm | SdIngrm | Root | Root |
| AtCLE12       | 0.1   | 0.7  | -0.2   | 0      | 0      | 0     | 0.1    | -0.5        | 0.3  | -0.1       | 0       | 0.2  | 0.7      | -0.2      | 0          | 0      | -0.1   | -0.1   | 0    | -0.5 | 1.8  | -0.4    | -0.3    | 0.8  | 1.8  | -0.1    | -0.3    | 1.3  | 1.6  |
| AtCLE3        | 0     | 0    | 0      | 0      | 0      | 0     | 0      | 0           | 0.3  | 0          | 0       | 0.4  | 0.4      | 0         | 0.1        | 0      | 0      | 0      | 0    | 0    | 0    | 0       | 0       | 0.2  | 0    | 0       | 0       | 0    | 0    |
| AtCLE6        | 0     | 1.2  | -0.1   | -0.1   | 0      | -0.1  | 0      | 0           | 3.6  | 0          | 0       | 3.7  | 0.3      | 0.1       | 0.9        | 0      | 0      | 0      | 0    | -0.2 | 2.6  | 0       | 0.2     | 1.8  | 1.5  | 0       | 0       | 1.3  | 0.8  |
| AtCLE2        | 0.2   | 0    | 0      | 0      | 0.1    | 0     | 0      | -0.1        | 4.1  | 0          | 0       | 3.9  | 0.6      | -0.1      | 0.4        | 0.1    | 0      | 0      | 0.1  | -0.1 | 3.4  | 0       | -0.1    | 2.7  | 2.7  | 0       | 0       | 2.6  | 2.3  |
| AtCLE17       | -0.1  | 0.4  | -0.1   | -0.1   | -0.2   | -0.8  | -0.3   | 0.7         | 0.4  | 0.6        | 0       | 0    | 0        | 0.1       | -0.4       | 0.1    | 0.1    | 0      | 0.1  | 0.2  | 0.3  | 0.2     | 0       | 0.2  | 0.1  | 0.3     | 0.3     | 0.3  | 0.1  |
| AtCLE27       | -0.2  | 0.1  | 0      | 0.1    | 0.1    | -0.4  | -0.2   | 1.1         | -0.1 | 0.6        | -0.1    | 0    | 0.4      | 0         | 0.1        | 0      | 0.2    | 0.3    | 0    | 0.4  | 0.3  | -0.1    | -0.4    | -0.5 | -0.1 | -0.2    | -0.2    | -0.3 | -0.1 |
| AtCLE46       | 0     | 1.5  | 0.7    | 0.7    | 0.6    | -0.2  | 0      | 1.9         | 0.9  | 0.2        | 0       | 2.1  | 0.4      | 0.3       | 0          | 0      | -0.1   | 0      | 0    | 0.5  | 0    | 0.2     | 0.2     | -0.2 | 0    | 0       | 0       | -0.1 | -0.1 |
| AtCLE41       | 0     | 1.7  | 0.3    | 0.4    | 0      | -1.6  | -0.8   | 0.5         | 0.2  | 1          | 0.2     | 0.1  | -1.8     | 0.1       | -2.1       | 0      | 0      | 0      | -0.2 | 0    | -0.3 | -0.7    | -0.6    | -1   | -0.6 | -0.8    | -0.4    | -0.3 | -0.2 |
| AtCLE44       | 0     | 1.6  | 0.2    | 0.5    | 0.4    | 0.8   | 0      | 0.6         | 0.1  | 0.4        | 0.1     | -0.2 | -0.5     | -0.2      | -0.9       | 0      | -0.2   | -0.1   | 0.5  | 0    | 0    | 0       | 0.5     | -0.4 | -0.7 | -0.4    | 0.1     | 1.1  | 1    |
| AtCLE9        | 0     | -0.6 | 0.2    | 0.2    | 0.2    | -0.2  | 0.1    | -0.1        | -0.5 | -0.2       | 0.5     | -0.4 | 0.4      | 0         | 0.1        | 0.7    | 0.8    | 0.7    | 0.6  | 0.1  | 0    | 0.4     | 0.2     | -0.2 | -0.2 | 0.5     | 0.5     | -0.3 | -0.4 |
| AtCLV3        | 0     | -0.1 | 0      | 0      | 0      | -0.1  | 0      | 0.1         | -0.1 | 0.4        | 0       | -0.2 | 1.8      | -0.1      | 0.9        | 0      | -0.2   | 0      | 0.1  | -0.3 | -0.1 | 0       | 0       | -0.2 | -0.1 | 0       | 0       | 0    | -0.1 |
| AtCLE40       | 0     | -0.1 | 0      | 0      | 0      | 0     | 0      | 0           | -0.1 | 0          | 0       | -0.1 | 0.6      | 0         | 0.3        | 0      | 0      | 0      | 0    | -0.1 | 0    | 0       | 0       | 0    | 0    | 0       | 0       | 0    | 0    |
| AtCLE26       | 0     | 1.2  | -0.1   | 0      | 0.3    | -0.1  | 1.5    | -0.1        | 0.1  | 0          | 0       | 0.2  | 0.6      | 1.3       | -0.2       | 0.4    | -0.1   | -0.1   | 0.2  | 0.4  | -0.1 | 0.5     | 0.4     | -0.1 | -0.1 | 0.3     | 0.1     | 0    | 0.2  |
| AtCLE21       | 0.2   | 0.3  | 0.1    | 0.1    | 0.3    | 0.7   | 0.7    | 0.1         | -0.1 | 0          | 0       | -0.1 | 0.1      | 0.1       | 0          | 0      | 0      | 0      | 0    | -0.1 | -0.3 | 0       | 0       | -0.2 | 0    | -0.1    | 0       | -0.2 | -0.1 |

**Tissue type key:**

|                                                                                                                                               |                                                                                                                                                              |
|-----------------------------------------------------------------------------------------------------------------------------------------------|--------------------------------------------------------------------------------------------------------------------------------------------------------------|
| <span style="background-color: #90EE90; border: 1px solid black; padding: 2px;">Cotyl</span> Cotyledon                                        | <span style="background-color: #800080; border: 1px solid black; padding: 2px;">Dev</span> Developmental Baseline                                            |
| <span style="background-color: #90EE90; border: 1px solid black; padding: 2px;">Hyp1</span> Hypocotyl                                         | <span style="background-color: #800000; border: 1px solid black; padding: 2px;">Poll</span> Pollen                                                           |
| <span style="background-color: #90EE90; border: 1px solid black; padding: 2px;">FlwRos</span> Entire Rosette After Transitioning to Flowering | <span style="background-color: #00CED1; border: 1px solid black; padding: 2px;">Sd+Sq</span> Seed and Silique Development                                    |
| <span style="background-color: #90EE90; border: 1px solid black; padding: 2px;">SenLf</span> Senescing Leaf                                   | <span style="background-color: #008000; border: 1px solid black; padding: 2px;">PhCh</span> Phase Change                                                     |
| <span style="background-color: #90EE90; border: 1px solid black; padding: 2px;">CaulLf</span> Cauline Leaf                                    | <span style="background-color: #00CED1; border: 1px solid black; padding: 2px;">CAGE</span> Comparison with CAGE (Compendium of Arabidopsis Gene Expression) |
| <span style="background-color: #90EE90; border: 1px solid black; padding: 2px;">ShoApx.Infl</span> Shoot Apex, Inflorescence                  | <span style="background-color: #808000; border: 1px solid black; padding: 2px;">MS</span> Development on MS Agar                                             |
| <span style="background-color: #90EE90; border: 1px solid black; padding: 2px;">Root</span> Root                                              |                                                                                                                                                              |
| <span style="background-color: #90EE90; border: 1px solid black; padding: 2px;">ShoApx.Veg</span> Shoot Apex, Vegetative                      |                                                                                                                                                              |
| <span style="background-color: #90EE90; border: 1px solid black; padding: 2px;">SdIngrm</span> Seedling, Green Parts                          |                                                                                                                                                              |
| <span style="background-color: #90EE90; border: 1px solid black; padding: 2px;">Root</span> Root                                              |                                                                                                                                                              |
| <span style="background-color: #FF0000; border: 1px solid black; padding: 2px;">Mat.Poll</span> Mature Pollen                                 |                                                                                                                                                              |
| <span style="background-color: #FFA500; border: 1px solid black; padding: 2px;">Seed3+Sil</span> Seeds Stage 3 w/o Siliques                   |                                                                                                                                                              |
| <span style="background-color: #FFA500; border: 1px solid black; padding: 2px;">Seed10-Sil</span> Seed Stage 10 w/ Siliques                   |                                                                                                                                                              |
| <span style="background-color: #90EE90; border: 1px solid black; padding: 2px;">VegRos</span> Vegetative Rosette                              |                                                                                                                                                              |
| <span style="background-color: #90EE90; border: 1px solid black; padding: 2px;">Lf</span> Leaf                                                |                                                                                                                                                              |
| <span style="background-color: #FFD700; border: 1px solid black; padding: 2px;">Flw</span> Flower                                             |                                                                                                                                                              |
